# Supplementary material
Source: PubMed Central journal article supplement (PMC2048738)
Supplement: plntphys_pp.107.103713v2_1.pdf [file plntphys_pp.107.103713v2_1.pdf]

1

2 **APPENDIXES**3 **Appendix A**

4

5 The rate equations of the model of photosynthetic carbon metabolism. The subscripts of

6  $v_1, v_2, \dots, v_{131}$  correspond to the numbers in Fig. 1. The kinetic parameters in the rate

7 equations are listed in Appendices C and D. See Appendix G for definitions of

8 abbreviations.

9

$$v_1 = \frac{\text{RuBP} \times W_C \times \min(1, \frac{\text{RuBP}}{E_t})}{(\text{RuBP} + K_r (1 + \frac{\text{PGA}}{K_{111}} + \frac{\text{FBP}}{K_{112}} + \frac{\text{SBP}}{K_{113}} + \frac{\text{Pi}}{K_{114}} + \frac{\text{NADPH}}{K_{115}}))}$$

$$W_C = \frac{V_{C\max} \times \text{CO}_2}{\text{CO}_2 + K_{M11} (1 + \frac{\text{O}_2}{K_{M12}})}$$

$$v_2 = \frac{V_2 \times (\text{PGA} \times \text{ATP} - \frac{\text{DPGA} \times \text{ADP}}{K_{E2}})}{(\text{PGA} + K_{M21})(\text{ATP} + K_{M22} (1 + \frac{\text{ADP}}{K_{M23}}))}$$

$$v_3 = \frac{V_3 \times \text{DPGA} \times \text{NADPH}}{(\text{DPGA} + K_{M31})(\text{NADPH} + K_{M32})}$$

$$v_5 = \frac{V_5 \times (\text{GAP} \times \text{DHAP} - \frac{\text{FBP}}{K_{E5}})}{K_{M51} K_{M52} (1 + \frac{\text{GAP}}{K_{M51}} + \frac{\text{DHAP}}{K_{M52}} + \frac{\text{FBP}}{K_{M53}} + \frac{\text{GAP} \times \text{DHAP}}{K_{M51} K_{M52}})}$$

10

$$v_6 = \frac{V_6 \times (\text{FBP} - \frac{\text{F6P} \times \text{Pi}}{K_{E6}})}{\text{FBP} + K_{M61} \left(1 + \frac{\text{F6P}}{K_{I61}} + \frac{\text{Pi}}{K_{I62}}\right)}$$

$$\text{TEMP1} = \text{Xu5P} \times \left(1 + \frac{\text{E4P} \times \text{Ri5P}}{K_{m71}}\right) + \text{E4P} + \text{Ri5P}$$

$$\text{Den} = 1 + \left(1 + \frac{\text{GAP}}{K_{M72}}\right) \times \left(\frac{\text{F6P}}{K_{M104}} + \frac{\text{S7P}}{K_{M103}}\right) + \frac{\text{GAP}}{K_{M102}} + \frac{\text{TEMP1}}{K_{M101}}$$

$$v_7 = \frac{V_7 \times (\text{F6P} \times \text{GAP} \times K_{E7} - \text{Xu5P} \times \text{E4P})}{(K_{M71} \times K_{M101} \times \text{Den})}$$

$$v_8 = \frac{V_8 \times (\text{DHAP} \times \text{E4P} - \frac{\text{SBP}}{K_{E8}})}{(\text{E4P} + K_{M82})(\text{DHAP} + K_{M81})}$$

$$v_9 = \frac{V_9 \times (\text{SBP} - \frac{\text{Pi} \times \text{S7P}}{K_{E9}})}{\text{SBP} + K_{M9} \left(1 + \frac{\text{Pi}}{K_{I9}}\right)}$$

$$v_{10} = \frac{V_{10} \times (\text{GAP} \times \text{S7P} \times K_{E10} - \text{Ri5P} \times \text{Xu5P})}{(K_{M71} \times K_{M101} \times \text{Den})}$$

1

2 Alternate simplified equations for  $v_7$  and  $v_{10}$  can also be used following Poolman et al  
3 (2000).

$$v_{13} = \frac{V_{13} \times (ATP \times Ru5P - \frac{ADP \times RuBP}{K_{E13}})}{(ATP \times (1 + \frac{ADP}{K_{I134}}) + K_{M132} (1 + \frac{ADP}{K_{I135}})) (Ru5P + K_{M131} (1 + \frac{GAP}{K_{I131}} + \frac{RuBP}{K_{I132}} + \frac{Pi}{K_{I133}}))}$$

$$v_{16} = \frac{V_{16} \times (ADP \times Pi - \frac{ATP}{K_{E13}})}{(ADP + K_{M161})(Pi + K_{M162})}$$

$$v_{23} = \frac{V_{23} \times G1P \times ATP}{(G1P + K_{M231}) ((1 + \frac{ADP}{K_{I23}})(ATP + K_{M232}) + \frac{K_{M232} \times Pi}{K_{A231} \times PGA + K_{A232} \times F6P + K_{A233} \times FBP})}$$

$$N = 1 + (1 + \frac{K_{M313}}{P_{ext}}) (\frac{Pi}{K_{M312}} + \frac{PGA}{K_{M32}} + \frac{GAP}{K_{M33}} + \frac{DHAP}{K_{M311}})$$

$$v_{31} = \frac{V_{31} \times DHAP}{K_{M311} N}$$

$$v_{32} = \frac{V_{32} \times PGA}{K_{M32} N}$$

$$v_{33} = \frac{V_{33} \times GAP}{K_{M33} N}$$

1

2

3

4

5

6

7

8

9

1  
2

$$3 \quad v_{55} = \frac{V_{55} \times (UTPc \times G1Pc - \frac{UDPGc \times OPOPc}{K_{E551}})}{K_{m551} K_{m552} \left(1 + \frac{UTPc}{K_{m551}} + \frac{G1Pc}{K_{m552}} + \frac{UDPGc}{K_{m553}} + \frac{OPOPc}{K_{m554}} + \frac{UTPc \times G1Pc}{K_{m551} K_{m552}} + \frac{UDPGc \times OPOPc}{K_{m553} K_{m554}}\right)}$$

$$4 \quad v_{56} = \frac{V_{56} \times (F6Pc \times UDPGc - \frac{SUCPc \times UDPc}{K_{E56}})}{(F6Pc + K_{m561} \left(1 + \frac{FBPc}{K_{1562}}\right)) (UDPGc + K_{m562} \left(1 + \frac{UDPc}{K_{1561}}\right)) \left(1 + \frac{SUCPc}{K_{1563}}\right) \left(1 + \frac{SUCc}{K_{1565}}\right) \left(1 + \frac{Pic}{K_{1564}}\right)}$$

$$5 \quad v_{57} = \frac{V_{57} \times (SUCPc - \frac{SUCc \times Pic}{K_{E57}})}{SUCPc + K_{m571} \times \left(1 + \frac{SUCc}{K_{m572}}\right)}$$

$$6 \quad v_{58} = \frac{V_{58} \times F26BPc}{K_{m581} \times \left(1 + \frac{F26BPc}{K_{m581}}\right) \left(1 + \frac{Pic}{K_{1582}}\right) \left(1 + \frac{F6Pc}{K_{1581}}\right)}$$

$$7 \quad v_{59} = \frac{V_{59} \times (ATPc \times F6Pc - \frac{ADPc \times F26BPc}{K_{E59}})}{(F6Pc + K_{m593} \times \left(1 + \frac{F26BPc}{K_{m592}}\right)) \left(1 + \frac{DHAPc}{K_{1592}}\right) \left((ATPc + K_{m591} \times \left(1 + \frac{ADPc}{K_{1591}}\right))\right)}$$

$$8 \quad v_{60} = \frac{V_{60} \times (ATPc \times UDPc - ADPc \times UTPc/KE60)}{K_{m602} K_{m603} \times \left(1 + \frac{ATPc}{K_{m602}} + \frac{UDPc}{K_{m603}} + \frac{ATPc \times UDPc}{K_{m602} \times K_{m603}} + \frac{ADPc}{K_{m601}} + \frac{UTPc}{K_{m604}} + \frac{ADPc \times UTPc}{K_{m601} K_{m604}}\right)}$$

$$v_{111} = \frac{\text{RuBP} \times W_o \times \min(1, \frac{\text{RuBP}}{E_t})}{(\text{RuBP} + K_r(1 + \frac{\text{PGA}}{K_{i11}} + \frac{\text{FBP}}{K_{i12}} + \frac{\text{SBP}}{K_{i13}} + \frac{\text{PI}}{K_{i14}} + \frac{\text{NADPH}}{K_{i15}}))}$$

$$W_o = \frac{V_{111} \times O_2}{O_2 + K_o(1 + \frac{CO_2}{k_C})}$$

$$v_{112} = \frac{V_{112} \times \text{PGCA}}{\text{PGCA} + K_{m112}(1 + \text{GCA}/K_{i1121})(1 + \text{Pi}/K_{i1122})}$$

$$v_{113} = \frac{V_{113} \times (\text{ATP} \times \text{GCEA} - \frac{\text{ADP} \times \text{PGA}}{K_{E113}})}{(\text{ATP} + K_{m1131}(1 + \frac{\text{PGA}}{K_{i113}}))(\text{GCEA} + K_{m1132})}$$

$$v_{121} = \frac{V_{121} \times \text{GCAc}}{\text{GCAc} + K_{m121}}$$

$$v_{122} = \frac{V_{122} \times (\text{GOAc} \times \text{SERc} - \frac{\text{HPRc} \times \text{GLYc}}{K_{E122}})}{(\text{GOAc} + K_{m1221})(\text{SERc} + K_{m1222}(1 + \frac{\text{GLYc}}{K_{i1221}}))}$$

1

$$v_{123} = \frac{V_{123} \times (\text{HPRc} \times \text{NADHc} - \frac{\text{NADc} \times \text{Gcea}}{K_{E123}})}{\text{HPRc} + K_{m1231}(1 + \text{HPRc}/K_{i123})}$$

$$v_{124} = \frac{V_{124} \times (\text{GOAc} \times \text{GLUc} - \frac{\text{KGc} \times \text{GLYc}}{K_{E124}})}{(\text{GOAc} + K_{m1241})(\text{GLUc} + K_{m1242}(1 + \text{GLYc}/K_{i124}))}$$

$$v_{131} = \frac{V_{131} \times \text{GLYc}}{\text{GLYc} + K_{m1311}(1 + \text{SERc}/K_{i1311})}$$

1

$$v_{1in} = V_{1T} \frac{GCEAc}{GCEAc + K_{M1011} \left(1 + \frac{GCAc}{K_{I1011}}\right)}$$

$$v_{1out} = V_{1T} \frac{GCEA}{GCEA + K_{M1011} \left(1 + \frac{GCA}{K_{I1011}}\right)}$$

$$v_{2out} = V_{2T} \frac{GCA}{GCA + K_{M1012} \left(1 + \frac{GCEA}{K_{I1012}}\right)}$$

$$v_{2in} = V_{2T} \frac{GCAc}{GCAc + K_{M1012} \left(1 + \frac{GCEAc}{K_{I1012}}\right)}$$

$$T3P = GAP + DHAP$$

$$Pent = Ru5P + Ri5P + Xu5P$$

$$HexP = G6P + F6P + G1P$$

$$GAP = \frac{T3P}{1 + K_{e4}}$$

$$DHAP = \frac{K_{e3} \times T3P}{1 + K_{e4}}$$

$$G6P = \frac{HexP}{\frac{1}{K_{E21}} + K_{E22} + 1}$$

$$F6P = \frac{\frac{1}{K_{E21}} \times HexP}{\frac{1}{K_{E21}} + K_{E22} + 1}$$

$$G1P = \frac{K_{E22} \times HexP}{\frac{1}{K_{E21}} + K_{E22} + 1}$$

$$Ru5P = \frac{Pent}{\frac{1}{K_{E11}} + \frac{1}{K_{E12}} + 1}$$

$$Ri5P = \frac{\frac{1}{K_{E11}} \times Pent}{\frac{1}{K_{E11}} + \frac{1}{K_{E12}} + 1}$$

$$Xu5P = \frac{\frac{1}{K_{E12}} \times Pent}{\frac{1}{K_{E11}} + \frac{1}{K_{E12}} + 1}$$

2

$$[CA] = [ADP] + [ATP]$$

$$[CN] = [NADP] + [NADPH]$$

$$[CP] = [Pi] + [PGA] + 2[BPGA] + [GAP] + [DHAP] + 2[FBP] + [F6P] + [E4P] + 2[SBP]$$

3

$$+ [S7P] + [Xu5P] + [Ri5P] + [Ru5P] + 2[RuBP] + [G6P] + [G1P] + [ATP] + [PGCA]$$

$$[CA_c] = [ADP_c] + [ATP_c]$$

$$[CP_c] = 2 * ([FBP_c] + [F26BP_c]) + [PGA_c] + [T3P_c] + [HexP_c] + [SUCP] + [UTP_c] + [ATP_c] + [Pi]$$

$$[CN_c] = [NAD_c] + [NADH_c]$$

$$[CU_c] = [UDP_c] + [UTP_c]$$

## 1 Appendix B

2 Differential equations to describe rates of change in each intermediate of carbon

3 metabolism. See Appendix A for definition of  $v_1, v_2, \dots, v_{131}$ .

$$\frac{d[\text{RuBP}]}{dt} = v_{13} - v_1 - v_{111};$$

$$\frac{d[\text{PGA}]}{dt} = 2v_1 - v_2 - v_{32} + v_{111} + v_{113};$$

$$\frac{d[\text{DPGA}]}{dt} = v_2 - v_3;$$

$$\frac{d[\text{T3P}]}{dt} = v_3 - 2v_5 - v_7 - v_8 - v_{10} - v_{31} - v_{33};$$

$$\frac{d[\text{FBP}]}{dt} = v_5 - v_6;$$

$$\frac{d[\text{E4P}]}{dt} = v_7 - v_8;$$

$$\frac{d[\text{S7P}]}{dt} = v_9 - v_{10};$$

$$\frac{d[\text{SBP}]}{dt} = v_8 - v_9;$$

$$\frac{d[\text{ATP}]}{dt} = v_{16} - v_2 - v_{23} - v_{13} - v_{113};$$

$$\frac{d[\text{HexP}]}{dt} = v_6 - v_7 - v_{23};$$

$$\frac{d[\text{PenP}]}{dt} = v_7 + 2v_{10} - v_{13};$$

$$\frac{d[\text{GOAc}]}{dt} = v_{121} - v_{122} - v_{124}$$

$$\frac{d[\text{SERc}]}{dt} = v_{131} - v_{122}$$

$$\frac{d[\text{GLYc}]}{dt} = v_{122} + v_{124} - 2v_{131}$$

$$\frac{d[\text{HPRc}]}{dt} = v_{122} - v_{123}$$

$$\frac{d[\text{GCEAc}]}{dt} = v_{123} - v_{1in} + v_{1out}$$

$$\frac{d[\text{GCEA}]}{dt} = v_{1in} - v_{113} - v_{1out}$$

$$\frac{d[\text{GCA}]}{dt} = v_{112} - v_{2out} + v_{2in}$$

$$\frac{d[\text{PGCA}]}{dt} = v_{111} - v_{112}$$

$$\frac{d[\text{GCAc}]}{dt} = v_{2out} - v_{121} - v_{2in}$$

4

5

6

7

$$\frac{d[\text{OPOPc}]}{dt} = v_{55} - v_{61}$$

$$\frac{d[\text{UTPc}]}{dt} = v_{60} - v_{55}$$

$$1 \quad \frac{d[\text{SUcPc}]}{dt} = v_{56} - v_{57}$$

$$\frac{d[\text{SUcC}]}{dt} = v_{57} - v_{62}$$

$$\frac{d[\text{PGAc}]}{dt} = v_{32} - v_{\text{pga\_use}}$$

$$\frac{d[\text{T3Pc}]}{dt} = v_{31} + v_{33} - 2v_{51}$$

$$\frac{d[\text{FBPc}]}{dt} = v_{51} - v_{52}$$

$$\frac{d[\text{HexPc}]}{dt} = v_{52} - v_{55} - v_{59} + v_{58} - v_{56}$$

$$2 \quad \frac{d[\text{F26BPc}]}{dt} = v_{59} - v_{58}$$

$$\frac{d[\text{UDPGc}]}{dt} = v_{55} - v_{56}$$

$$\frac{d[\text{ATPc}]}{dt} = v_{\text{atpf}} - v_{59} - v_{60}$$



# 1 Appendix C

2 Kinetic parameters of the enzymes of the Calvin cycle, starch synthesis and triose  
3 phosphate export illustrated in Fig. 1.

## 4 Table C1

5 The Michaelis-Menten constants, inhibition constants and activation constants of the enzymes in  
6 the Calvin cycle, starch synthesis and triose phosphate export. The response coefficient of each  
7 parameter was calculated for the initial nitrogen distribution (See text).

| RN <sup>a</sup> | Reaction                                     | Par <sup>b</sup> | Value<br>(mM) <sup>c</sup> | Descriptio<br>n <sup>d</sup> | CC <sup>e</sup>     | Reference                                                                               |
|-----------------|----------------------------------------------|------------------|----------------------------|------------------------------|---------------------|-----------------------------------------------------------------------------------------|
| 1               | RuBP+CO <sub>2</sub> →2PGA                   | K <sub>M11</sub> | 0.0115                     | CO <sub>2</sub>              | -0.60               | Jordan and Ogren (1981), Tcherkez <i>et al.</i><br>(Tcherkez <i>et al.</i> , 2006)      |
| 1               | RuBP+CO <sub>2</sub> →2PGA                   | K <sub>M12</sub> | 0.222                      | O <sub>2</sub>               | 0.54                | Jordan and Ogren (1981), von Caemmerer (2000)                                           |
| 1               | RuBP+CO <sub>2</sub> →2PGA                   | K <sub>M13</sub> | 0.020                      | RuBP                         | -0.07               | Farquhar (1979)                                                                         |
| 1               | RuBP+CO <sub>2</sub> →2PGA                   | K <sub>i11</sub> | 0.84                       | PGA                          | 8×10 <sup>-4</sup>  | Badger and Lorimer (1981)                                                               |
| 1               | RuBP+CO <sub>2</sub> →2PGA                   | K <sub>i12</sub> | 0.04                       | FBP                          | 1×10 <sup>-3</sup>  | Badger and Lorimer (1981)                                                               |
| 1               | RuBP+CO <sub>2</sub> →2PGA                   | K <sub>i13</sub> | 0.075                      | SBP                          | 0.02                | Badger and Lorimer (1981)                                                               |
| 1               | RuBP+CO <sub>2</sub> →2PGA                   | K <sub>i14</sub> | 0.9                        | Pi                           | 2×10 <sup>-4</sup>  | Badger and Lorimer (1981)                                                               |
| 1               | RuBP+CO <sub>2</sub> →2PGA                   | K <sub>i15</sub> | 0.07                       | NADPH                        | 0.004               | Badger and Lorimer (1981)                                                               |
| 2               | PGA+ATP ↔ADP + DPGA                          | K <sub>M21</sub> | 0.240                      | PGA                          | 6×10 <sup>-4</sup>  | Larsson-Raznikiewicz (1967), Kopkesecondo <i>et al.</i> (1990)                          |
| 2               | PGA+ATP ↔ADP + DPGA                          | K <sub>M22</sub> | 0.390                      | ATP                          | 2×10 <sup>-3</sup>  | Larsson-Raznikiewicz (1967), Kopkesecondo <i>et al.</i> (1990)                          |
| 2               | PGA+ATP ↔ADP + DPGA                          | K <sub>M23</sub> | 0.23                       | ADP                          | -1×10 <sup>-3</sup> | Lee (1982)                                                                              |
| 2               | PGA+ATP↔ADP + DPGA                           | K <sub>E2</sub>  | 7.6<br>×10 <sup>-4</sup>   | Equ.<br>Const.               |                     | Laisk <i>et al.</i> (1989); Dietz <i>et al.</i> (1984); Heber <i>et al.</i> (1986)      |
| 3               | DPGA+NADPH+H <sup>+</sup> ↔GAP<br>+ Pi+NADP  | K <sub>M31</sub> | 0.004                      | BPGA                         | -5×10 <sup>-5</sup> | Trost <i>et al.</i> (1993)                                                              |
| 3               | DPGA+NADPH +H <sup>+</sup> ↔GAP<br>+ Pi+NADP | K <sub>M32</sub> | 0.100                      | NADPH                        | -4×10 <sup>-5</sup> | Cerf (1978), Ferri <i>et al.</i> (1978), Trost (1993),<br>Macioszek and Anderson (1987) |
| 4               | DHAP ↔GAP                                    | K <sub>E4</sub>  | 0.05                       | Equ.<br>Const.               | 6×10 <sup>-3</sup>  | Bassham and Krause (1969)                                                               |
| 5               | GAP+DHAP ↔FBP                                | K <sub>M51</sub> | 0.3                        | GAP                          | -2×10 <sup>-3</sup> | Iwaki <i>et al.</i> (1991)                                                              |
| 5               | GAP+DHAP ↔FBP                                | K <sub>M52</sub> | 0.4                        | DHAP                         | -9×10 <sup>-4</sup> | Iwaki <i>et al.</i> (1991)                                                              |
| 5               | GAP+DHAP ↔FBP                                | K <sub>M53</sub> | 0.02                       | FBP                          | 3×10 <sup>-4</sup>  | Brooks and Criddle (1966), Schnarrenberger and<br>Kruger (1986)                         |
| 5               | GAP+DHAP ↔FBP                                | K <sub>E5</sub>  | 7.1                        | Equ.<br>Const.               | 5×10 <sup>-5</sup>  | Bassham and Krause (1969),<br>Iwaki <i>et al.</i> (1991)                                |
| 6               | FBP→F6P+Pi                                   | K <sub>M61</sub> | 0.033                      | FBP                          | -2×10 <sup>-3</sup> | Charles and Halliwell (1981)                                                            |
| 6               | FBP→F6P+Pi                                   | K <sub>i61</sub> | 0.7                        | F6P                          | 4×10 <sup>-4</sup>  | Heldt (1983)                                                                            |
| 6               | FBP→F6P+Pi                                   | K <sub>i62</sub> | 12                         | Pi                           | 1×10 <sup>-5</sup>  | Charles and Halliwell (1981)                                                            |
| 6               | FBP→F6P+Pi                                   | K <sub>E6</sub>  | 6.7×10 <sup>5</sup>        | Equ                          | 4×10 <sup>-9</sup>  | Bassham and Krause (1969) , Laisk <i>et al.</i> (1989)                                  |

|    |                                                  |                   |                     |        |                     |                                                                 |
|----|--------------------------------------------------|-------------------|---------------------|--------|---------------------|-----------------------------------------------------------------|
|    |                                                  |                   |                     | Const. |                     |                                                                 |
| 7  | F6P+GAP→E4P+Xu5P                                 | K <sub>M71</sub>  | 0.1                 | Xu5P   | 4×10 <sup>-4</sup>  | Murphy and Walker (1982), Laisk <i>et al</i> (1989)             |
| 7  | F6P+GAP→E4P+Xu5P                                 | K <sub>M72</sub>  | 0.1                 | GAP    | 2×10 <sup>-3</sup>  | Sprenger et al (1995), Schenk et al (1998)                      |
| 7  | F6P+GAP→E4P+Xu5P                                 | K <sub>E7</sub>   | 10                  | Equ.   | 9×10 <sup>-4</sup>  | Bassham and Krause (1969), Laisk <i>et al.</i> (1989)           |
|    |                                                  |                   |                     | Const. |                     |                                                                 |
| 8  | E4P+DHAP→SBP                                     | K <sub>M8</sub>   | 0.02                | SBP    | 0                   | Brooks and Criddle (1966)                                       |
| 8  | E4P+DHAP→SBP                                     | K <sub>M81</sub>  | 0.4                 | DHAP   | -3×10 <sup>-4</sup> | Iwaki et al (1991)                                              |
| 8  | E4P+DHAP→SBP                                     | K <sub>M82</sub>  | 0.2                 | E4P    | -6×10 <sup>-4</sup> | Estimate                                                        |
| 8  | E4P+DHAP→SBP                                     | K <sub>E8</sub>   | 1.07                | Equ.   | 4×10 <sup>-34</sup> | Bassham and Krause (1969) , Laisk <i>et al.</i> (1989)          |
|    |                                                  |                   |                     | Const. |                     |                                                                 |
| 9  | SBP→S7P+Pi                                       | K <sub>M9</sub>   | 0.05                | SBP    | -0.03               | Woodrow et al (1983), Cadet and Meunier (1988)                  |
| 9  | SBP→S7P+Pi                                       | K <sub>I9</sub>   | 12                  | Pi     | 3×10 <sup>-4</sup>  | Woodrow et al(1983)                                             |
| 9  | SBP→S7P+Pi                                       | K <sub>E9</sub>   | 6.7×10 <sup>5</sup> | Equ.   | 4×10 <sup>-8</sup>  | Bassham and Krause (1969), Laisk <i>et al.</i> (1989)           |
|    |                                                  |                   |                     | Const. |                     |                                                                 |
| 10 | S7P+GAP→Ri5P+Xu5P                                | K <sub>M101</sub> | 0.118               | P5P    | 2×10 <sup>-4</sup>  | Racher (1961), Laisk <i>et al</i> (1989)                        |
| 10 | S7P+GAP→Ri5P+Xu5P                                | K <sub>M102</sub> | 0.072               | GAP    | -4×10 <sup>-4</sup> | Albe (1991); Laisk <i>et al</i> (1989)                          |
| 10 | S7P+GAP→Ri5P+Xu5P                                | K <sub>M103</sub> | 0.46                | S7P    | -5×10 <sup>-4</sup> | Albe (1991); Laisk <i>et al</i> (1989)                          |
| 10 | S7P+GAP→Ri5P+Xu5P                                | K <sub>M104</sub> | 1.54                | F6P    | 3×10 <sup>-5</sup>  | Albe (1991); Laisk <i>et al</i> (1989)                          |
| 10 | S7P+GAP→Ri5P+Xu5P                                | K <sub>E10</sub>  | 1.17                | Equ.   | 8×10 <sup>-4</sup>  | Bassham and Krause (1969), Laisk <i>et al.</i> (1989)           |
|    |                                                  |                   |                     | Const. |                     |                                                                 |
| 11 | Ri5P↔Ru5P                                        | K <sub>E11</sub>  | 0.4                 | Equ.   | 2×10 <sup>-3</sup>  | Bassham and Krause (1969)                                       |
|    |                                                  |                   |                     | Const. |                     |                                                                 |
| 12 | Xu5P↔Ru5P                                        | K <sub>E12</sub>  | 0.67                | Equ.   | 3×10 <sup>-3</sup>  | Bassham and Krause, (1969)                                      |
|    |                                                  |                   |                     | Const. |                     |                                                                 |
| 13 | Ru5P+ATP→RuBP+ADP                                | K <sub>M131</sub> | 0.05                | Ru5P   | -4×10 <sup>-3</sup> | Gardemann et al (1983), Omnaas et al (1985)                     |
| 13 | Ru5P+ATP→RuBP+ADP                                | K <sub>M132</sub> | 0.059               | ATP    | -2×10 <sup>-3</sup> | Laing et al (1981), Gardemann et al (1983), Omnaas et al (1985) |
| 13 | Ru5P+ATP→RuBP+ADP                                | K <sub>I131</sub> | 2                   | PGA    | 2×10 <sup>-4</sup>  | Gardemann et al (1983)                                          |
| 13 | Ru5P+ATP→RuBP+ADP                                | K <sub>I132</sub> | 0.7                 | RuBP   | 4×10 <sup>-3</sup>  | Gardemann et al (1983)                                          |
| 13 | Ru5P+ATP→RuBP+ADP                                | K <sub>I133</sub> | 4                   | Pi     | 2×10 <sup>-5</sup>  | Gardemann et al (1983)                                          |
| 13 | Ru5P+ATP→RuBP+ADP                                | K <sub>I134</sub> | 2.5                 | ADP    | 1×10 <sup>-3</sup>  | Gardemann et al (1983)                                          |
| 13 | Ru5P+ATP→RuBP+ADP                                | K <sub>E13</sub>  | 0.4                 | ADP    | 2×10 <sup>-4</sup>  | Gardemann et al (1983)                                          |
| 13 | Ru5P+ATP→RuBP+ADP                                | K <sub>I135</sub> | 6846                | Equ.   | 2×10 <sup>-3</sup>  | Bassham and Krause (1969), Laisk <i>et al.</i> (1989)           |
|    |                                                  |                   |                     | Const. |                     |                                                                 |
| 16 | ADP+Pi→ATP                                       | K <sub>M161</sub> | 0.014               | ADP    | -1×10 <sup>-5</sup> | Davenport and Mccarty (1986)                                    |
| 16 | ADP+Pi→ATP                                       | K <sub>M162</sub> | 0.3                 | Pi     | -6×10 <sup>-4</sup> | Aflalo and Shavit (1983)                                        |
| 16 | ADP+Pi→ATP                                       | K <sub>M163</sub> | 0.3                 | ATP    | 5×10 <sup>-6</sup>  | r.f. Laisk <i>et al.</i> (1989)                                 |
| 16 | ADP+Pi→ATP                                       | K <sub>E16</sub>  | 5.7                 | Equ.   | 0                   | Bassham and Krause (1969), Laisk <i>et al.</i> (1989)           |
|    |                                                  |                   |                     | Const. |                     |                                                                 |
| 21 | F6P↔G6P                                          | K <sub>E21</sub>  | 2.3                 | Equ.   | -2×10 <sup>-3</sup> | Bassham and Krause (1969)                                       |
|    |                                                  |                   |                     | Const. |                     |                                                                 |
| 22 | G6P↔G1P                                          | K <sub>E22</sub>  | 0.058               | Equ.   | -5×10 <sup>-5</sup> | Colowick and Sutherland (1942)                                  |
|    |                                                  |                   |                     | Const. |                     |                                                                 |
| 23 | G1P+ATP+G <sub>n</sub> →PPi+ADP+G <sub>n+1</sub> | K <sub>M231</sub> | 0.08                | G1P    | -6×10 <sup>-5</sup> | Pettersson and Ryde-Pettersson (1988)                           |
| 23 | G1P+ATP+G <sub>n</sub> →PPi+ADP+G <sub>n+1</sub> | K <sub>M232</sub> | 0.08                | ATP    | -4×10 <sup>-5</sup> | Pettersson and Ryde-Pettersson (1988)                           |

|    |                                        |            |       |           |                     |                                        |  |
|----|----------------------------------------|------------|-------|-----------|---------------------|----------------------------------------|--|
|    | $G_{n+1}$                              |            |       |           |                     |                                        |  |
| 23 | $G1P+ATP+Gn \rightarrow PPI+ADP+$      | $K_{A231}$ | 0.1   | PGA       | $2 \times 10^{-5}$  | Pettersson and Ryde-Pettersson (1988)  |  |
|    | $G_{n+1}$                              |            |       |           |                     |                                        |  |
| 23 | $G1P+ATP+Gn \rightarrow PPI+ADP+$      | $K_{A232}$ | 0.02  | F6P       | $2 \times 10^{-6}$  | Pettersson and Ryde-Pettersson (1988)  |  |
|    | $G_{n+1}$                              |            |       |           |                     |                                        |  |
| 23 | $G1P+ATP+Gn \rightarrow PPI+ADP+$      | $K_{A233}$ | 0.02  | FBP       | $3 \times 10^{-7}$  | Pettersson and Ryde-Pettersson (1988)  |  |
|    | $G_{n+1}$                              |            |       |           |                     |                                        |  |
| 23 | $G1P+ATP+Gn \rightarrow PPI+ADP+$      | $K_{I23}$  | 10    | ADP       | $7 \times 10^{-6}$  | Pettersson and Ryde-Pettersson (1988)  |  |
|    | $G_{n+1}$                              |            |       |           |                     |                                        |  |
| 31 | $P_{ext}+DHAP_i \rightarrow Pi+DHAP_o$ | $K_{M311}$ | 0.077 | DHAP      | $-6 \times 10^{-5}$ | Fliege et al (1978), Portis Jr. (1983) |  |
| 31 | $P_{ext}+DHAP_i \rightarrow Pi+DHAP_o$ | $K_{M312}$ | 0.63  | Pi        | $1 \times 10^{-5}$  | Fliege et al (1978), Portis Jr. (1983) |  |
| 31 | $P_{ext}+DHAP_i \rightarrow Pi+DHAP_o$ | $K_{M313}$ | 0.74  | $P_{ext}$ | $-4 \times 10^{-4}$ | Fliege et al (1978), Portis Jr. (1983) |  |
| 32 | $P_{ext}+PGA_i \rightarrow Pi+PGA_o$   | $K_{M32}$  | 0.25  | PGA       | $-9 \times 10^{-6}$ | Fliege et al (1978), Portis Jr. (1983) |  |
| 33 | $P_{ext}+GAP_i \rightarrow Pi+GAP_o$   | $K_{M33}$  | 0.075 | GAP       | $-3 \times 10^{-6}$ | Fliege et al (1978), Portis Jr. (1983) |  |

1

2 <sup>a</sup>RN: Reaction number corresponding to the number in Fig. 1.

3 <sup>b</sup> Parameters beginning  $K_M$  represent the Michaelis-Menten constant of the metabolite listed in the *description* column

4 Parameters beginning with  $K_I$  represent the inhibition constant of the inhibitor listed in the *description* column.

5 Parameters beginning with  $K_A$  represent the activation constant of the activator listed in the *description* column.

6 <sup>c</sup> The units of the equilibrium constant are mM (which is equivalent to  $\text{mmol l}^{-1}$ ) for all constants, except  $K_e$ . The unit of  $K_e$  for  
7 reactions with one substrate and one product, or reactions with two substrates and two products is dimensionless. The unit of  $K_e$  for  
8 reactions with one substrate and two products is mM. The unit for reactions with two substrates and one product is  $(\text{mM})^{-1}$ .

9 <sup>d</sup> The description column lists the compounds to which the kinetic constant applies.

10 <sup>e</sup> Response coefficients for different parameters used in the model

11

1 **Table C2**

2 The maximum rate of each enzyme ( $V_m$ ) normalized on maximum Rubisco carboxylation activity  
 3 ( $V_1$ )

| Maximum Velocity | Enzyme                                            | Reaction                                                                      | $V_m/V_1$ | Reference                                                                                                                                                                                                           |
|------------------|---------------------------------------------------|-------------------------------------------------------------------------------|-----------|---------------------------------------------------------------------------------------------------------------------------------------------------------------------------------------------------------------------|
| $V_1$            | Rubisco                                           | $\text{RuBP} + \text{CO}_2 \rightarrow 2\text{PGA}$                           | 1         | Latzko et al (1981), Woodrow (1986), Geiger et al. (1999), Haake et al. (1999), Chen et al. (2005), Strand et al. (2000), Strand et al (1999), Tamoi et al (2006), Peterkofsky and Racher (1961), Chen et al (2005) |
| $V_2$            | PGA Kinase                                        | $\text{PGA} + \text{ATP} \rightarrow \text{ADP} + \text{DPGA}$                | 10.3      | Same as above                                                                                                                                                                                                       |
| $V_3$            | GAP dehydrogenase                                 | $\text{DPGA} + \text{NADPH} \rightarrow \text{GAP} + \text{Pi} + \text{NADP}$ | 1.39      | Same as above                                                                                                                                                                                                       |
| $V_5$            | FBP Aldolase                                      | $\text{GAP} + \text{DHAP} \rightarrow \text{FBP}$                             | 0.42      | Same as above                                                                                                                                                                                                       |
| $V_6$            | FBPase                                            | $\text{FBP} \rightarrow \text{F6P} + \text{Pi}$                               | 0.25      | Same as above                                                                                                                                                                                                       |
| $V_7$            | Transketolase                                     | $\text{F6P} + \text{GAP} \rightarrow \text{E4P} + \text{Xu5P}$                | 1.07      | Same as above                                                                                                                                                                                                       |
| $V_8$            | Aldolase                                          | $\text{E4P} + \text{DHAP} \rightarrow \text{SBP}$                             | 0.42      | Same as above                                                                                                                                                                                                       |
| $V_9$            | SBPase                                            | $\text{SBP} \rightarrow \text{S7P} + \text{Pi}$                               | 0.11      | Same as above                                                                                                                                                                                                       |
| $V_{10}$         | Transketolase                                     | $\text{S7P} + \text{GAP} \rightarrow \text{Ri5P} + \text{Xu5P}$               | 1.07      | Same as above                                                                                                                                                                                                       |
| $V_{13}$         | Ribulosebiphosphate kinase                        | $\text{Ru5P} + \text{ATP} \rightarrow \text{RuBP} + \text{ADP}$               | 3.71      | Same as above                                                                                                                                                                                                       |
| $V_{16}$         | ATP synthase                                      | $\text{ADP} + \text{Pi} \rightarrow \text{ATP}$                               | 5.5       | Same as above                                                                                                                                                                                                       |
| $V_{23}$         | ADP-glucose pyrophosphorylase and Starch Synthase | $\text{ADPG} + \text{G}_n \rightarrow \text{G}_{(n+1)} + \text{ADP}$          | 0.1       | Same as above                                                                                                                                                                                                       |
| $V_{31}$         | Phosphate translocator                            | $\text{DHAP}_i \rightarrow \text{DHAP}_o$                                     | 0.3       | Lilley et al (1977)                                                                                                                                                                                                 |
| $V_{32}$         | Phosphate translocator                            | $\text{PGA}_i \rightarrow \text{PGA}_o$                                       | 0.3       | Lilley et al (1977)                                                                                                                                                                                                 |
| $V_{33}$         | Phosphate translocator                            | $\text{GAP}_i \rightarrow \text{GAP}_o$                                       | 0.3       | Lilley et al (1977)                                                                                                                                                                                                 |

1

2 **Table C3** The concentrations of the metabolites used in the model. The range of values found  
 3 in the literature are given in the adjacent column, together with their source.

4

| Metabolite name  | Model default (mmol l <sup>-1</sup> ) | Concentration range (mmol l <sup>-1</sup> ) | Reference                                                                                         |
|------------------|---------------------------------------|---------------------------------------------|---------------------------------------------------------------------------------------------------|
| RuBP             | 2.000                                 | 0.6-6                                       | Bassham and Krause (1969), Dietz and Heber (1984), Schimkat et al (1990), Woodrow and Mott (1993) |
| PGA              | 2.400                                 | 1.4-12                                      | Schimkat et al (1990), Woodrow and Mott (1993)                                                    |
| DPGA             | 0.0011                                | 0.8-1.4                                     | Dietz and Heber (1984), Woodrow and Mott (1993)                                                   |
| GAP              | 0.02                                  | 0.032-0.04                                  | Bassham and Krause (1969), Dietz and Heber (1984), Woodrow and Mott (1993)                        |
| DHAP             | 0.48                                  | 0.37-0.7                                    | Bassham and Krause (1969), Dietz and Heber (1984), Schimkat et al (1990)                          |
| FBP              | 0.670                                 | 0.067-0.52                                  | Bassham and Krause (1969), Dietz and Heber (1984), Schimkat et al (1990), Woodrow and Mott (1993) |
| E4P              | 0.050                                 | 0.02-0.05                                   | Bassham and Krause (1969), Woodrow and Mott (1993)                                                |
| S7P              | 2.0                                   | 0.248- 0.4                                  | Bassham and Krause (1969), Woodrow and Mott (1993)                                                |
| SBP              | 0.30                                  | 0.114-0.3                                   | Bassham and Krause (1969), Schimkat et al (1990), Woodrow and Mott (1993)                         |
| ATP              | 0.68                                  | 0.2-2.5                                     | Bassham and Krause (1969), Woodrow and Mott (1993), Igamberdiev et al (2001)                      |
| NADPH            | 0.21                                  | 0.21                                        | Giersch et al (1980), Woodrow and Mott (1993)                                                     |
| CO <sub>2</sub>  | 0.012                                 | 0.006                                       | Dietz and Heber (1984)                                                                            |
| O <sub>2</sub>   | 0.26                                  | 0.25                                        | Model estimate                                                                                    |
| HexP             | 2.2                                   | 3.2-4.85                                    | Schimkat et al (1990), Woodrow and Mott (1993), Winter et al (1994)                               |
| PenP             | 0.25                                  | 0.05-0.3                                    | Bassham and Krause (1969), Schimkat et al (1990), Woodrow and Mott (1993)                         |
| Pi               | 5                                     | 4-10                                        | Dietz and Heber (1984), Schimkat et al (1990), Woodrow and Mott (1993)                            |
| CP               | 15                                    | 15                                          | Lilley et al (1977)                                                                               |
| CA               | 1.5                                   | 1.5                                         | Igamberdiev et al (2001)                                                                          |
| CN               | 0.5                                   | 0.5                                         | Giersch et al (1980)                                                                              |
| P <sub>ext</sub> | 0.5                                   | 5                                           | Bligny et al (1990), Woodrow and Mott (1993)                                                      |

5

## 1 Appendix D

2 Kinetic parameters of the enzymes of photorespiration (PCOP). The source of each value  
3 is given in the final column.

### 4 Table D1

5 The Michaelis-Menten constants and inhibition constants for enzymes in PCOP

| RN <sup>a</sup> | Reaction                                                                 | Param. <sup>b</sup> | Value<br>(mM) <sup>c</sup> | Description <sup>d</sup>                             | CC <sup>e</sup>       | Reference                      |
|-----------------|--------------------------------------------------------------------------|---------------------|----------------------------|------------------------------------------------------|-----------------------|--------------------------------|
| 112             | 2-PGCA + H <sub>2</sub> O → GCA + Pi                                     | K <sub>M112</sub>   | 0.026                      | PGCA                                                 | -5×10 <sup>-7</sup>   | Christeller and Tolbert (1978) |
| 112             | 2-PGCA + H <sub>2</sub> O → GCA + Pi                                     | K <sub>I1121</sub>  | 94                         | GCA, competitive with PGCA                           | 5×10 <sup>-9</sup>    | Christeller and Tolbert (1978) |
| 112             | 2-PGCA + H <sub>2</sub> O → GCA + Pi                                     | K <sub>I1122</sub>  | 2.55                       | Pi, competitive with PGCA                            | 7×10 <sup>-9</sup>    | Christeller and Tolbert (1978) |
| 113             | GCEA + ATP → PGA + ADP                                                   | K <sub>M1131</sub>  | 0.21                       | ATP                                                  | 1×10 <sup>-8</sup>    | Kleczkowski et al (1985)       |
| 113             | GCEA + ATP → PGA + ADP                                                   | K <sub>M1132</sub>  | 0.25                       | GCEA                                                 | -3×10 <sup>-10</sup>  | Kleczkowski et al (1985)       |
| 113             | GCEA + ATP → PGA + ADP                                                   | K <sub>I113</sub>   | 0.36                       | PGA, competitive with ATP                            | -2×10 <sup>-8</sup>   | Kleczkowski and Randall (1988) |
| 113             | GCEA + ATP → PGA + ADP                                                   | K <sub>E113</sub>   | 300                        | Equil. Const.                                        | 6×10 <sup>-8</sup>    | Kleczkowski et al (1985)       |
| 121             | GCA <sub>c</sub> + O <sub>2</sub> → H <sub>2</sub> O <sub>2</sub> + GOAc | K <sub>M121</sub>   | 0.1                        | GCA <sub>c</sub>                                     | -8×10 <sup>-9</sup>   | Tolbert (1981)                 |
| 122             | GOAc + SER <sub>c</sub> → HPR <sub>c</sub> + GLY <sub>c</sub>            | K <sub>M1221</sub>  | 0.15                       | GOAc                                                 | -1×10 <sup>-8</sup>   | Nakamura and Tolbert (1983)    |
| 122             | GOAc + SER <sub>c</sub> → HPR <sub>c</sub> + GLY <sub>c</sub>            | K <sub>M1222</sub>  | 2.7                        | SER <sub>c</sub>                                     | 4×10 <sup>-12</sup>   | Nakamura and Tolbert (1983)    |
| 122             | GOAc + SER <sub>c</sub> → HPR <sub>c</sub> + GLY <sub>c</sub>            | K <sub>I1221</sub>  | 33                         | GLY <sub>c</sub> , competitive with SER <sub>c</sub> | 2×10 <sup>-14</sup>   | Nakamura and Tolbert (1983)    |
| 122             | GOAc + SER <sub>c</sub> → HPR <sub>c</sub> + GLY <sub>c</sub>            | K <sub>E122</sub>   | 0.24                       | Equil. Const.                                        | -2×10 <sup>-8</sup>   | Guynn (1982)                   |
| 123             | HPR <sub>c</sub> + NAD <sub>c</sub> → NADH <sub>c</sub> + GCEAc          | K <sub>M123</sub>   | 0.09                       | HPR <sub>c</sub>                                     | -2×10 <sup>-11</sup>  | Kleczkowski and Edwards (1989) |
| 123             | HPR <sub>c</sub> + NAD <sub>c</sub> → NADH <sub>c</sub> + GCEAc          | K <sub>I123</sub>   | 12                         | HPR <sub>c</sub> , self inhibition                   | -1.5×10 <sup>-9</sup> | Kleczkowski and Edwards (1989) |
| 123             | HPR <sub>c</sub> + NAD <sub>c</sub> → NADH <sub>c</sub> + GCEAc          | K <sub>E123</sub>   | 2.5<br>×10 <sup>5</sup>    | Equil. Const.                                        | -6×10 <sup>-10</sup>  | Guynn (1982)                   |
| 124             | GOAc + GLU <sub>c</sub> → KG <sub>c</sub> + GLY <sub>c</sub>             | K <sub>M1241</sub>  | 0.15                       | GOAc                                                 | 1×10 <sup>-7</sup>    | Nakamura and Tolbert (1983)    |
| 124             | GOAc + GLU <sub>c</sub> → KG <sub>c</sub> + GLY <sub>c</sub>             | K <sub>M1242</sub>  | 1.7                        | GLU <sub>c</sub>                                     | -2×10 <sup>-8</sup>   | Nakamura and Tolbert (1983)    |
| 124             | GOAc + GLU <sub>c</sub> → KG <sub>c</sub> + GLY <sub>c</sub>             | K <sub>I124</sub>   | 2                          | GLY <sub>c</sub> competitive                         | -2×10 <sup>-13</sup>  | Calibrated                     |

|      |                                                                   |             |      |                                  |                      |                              |
|------|-------------------------------------------------------------------|-------------|------|----------------------------------|----------------------|------------------------------|
| 124  | GOAc + GLUc → KGc + GLYc                                          | $K_{E124}$  | 607  | with GLU<br>Equi. Const.         | $-3 \times 10^{-14}$ | Cooper and Meister<br>(1972) |
| 131  | GLYc + NADc → CO <sub>2</sub> + NH <sub>3</sub> +<br>SERc + NADHc | $K_{M1311}$ | 6    | GLYc                             | $-2 \times 10^{-13}$ | Douce et al (2001)           |
| 131  | GLYc + NADc<br>→ CO <sub>2</sub> + NH <sub>3</sub> + SERc + NADHc | $K_{I1311}$ | 4    | SERc, competitive<br>with GLYc   | $6 \times 10^{-9}$   | Douce et al (2001)           |
| 101a | GCEAc → GCEA                                                      | $K_{M1011}$ | 0.39 | GCEA                             | $-4 \times 10^{-8}$  | Howitz and McCarty<br>(1986) |
| 101a | GCEAc → GCEA                                                      | $K_{I1011}$ | 0.28 | GCA, competitive<br>with GCEA    | $-2 \times 10^{-11}$ | Howitz and McCarty<br>(1986) |
| 101b | GCA → GCAc                                                        | $K_{M1012}$ | 0.2  | GCA                              | $-4 \times 10^{-9}$  | Howitz and McCarty<br>(1985) |
| 101b | GCA → GCAc                                                        | $K_{I1012}$ | 0.22 | GCEA,<br>competitive with<br>GCA | $-1 \times 10^{-10}$ | Howitz and McCarty<br>(1985) |

1 <sup>a b c d e</sup> The description is same as in the Table C1.

1

2 **Table D2** The maximum rate of each enzyme ( $V_m$ ) of the PCOP as given in Table 1, but here  
 3 normalized on the maximum Rubisco carboxylation activity ( $V_1$ ).

4

| Max. Velocity | Enzyme name                                  | Reaction                                                                                       | $V_m/V_1$ | Reference                                                                                                                   |
|---------------|----------------------------------------------|------------------------------------------------------------------------------------------------|-----------|-----------------------------------------------------------------------------------------------------------------------------|
| $V_{111}$     | Rubisco                                      | $\text{RuBP} + \text{O}_2 \rightarrow \text{PGA} + \text{PGCA}$                                | 0.24      | Ueno et al (2005); Marek and Spalding (1991); Ku et al (1991), Devi and Raghavendra (1993), Devi et al. (Devi et al., 1995) |
| $V_{112}$     | Phosphoglycolate phosphatase                 | $2\text{-PGCA} + \text{H}_2\text{O} \rightarrow \text{GCA} + \text{Pi}$                        | 18.0      | Same as above                                                                                                               |
| $V_{113}$     | Glycerate kinase                             | $\text{GCEA} + \text{ATP} \rightarrow \text{PGA} + \text{ADP}$                                 | 1.96      | Same as above                                                                                                               |
| $V_{121}$     | Glycolate oxidase                            | $\text{GCAc} + \text{O}_2 \rightarrow \text{H}_2\text{O}_2 + \text{GOAc}$                      | 0.45      | Same as above                                                                                                               |
| $V_{122}$     | Serine glyoxylate aminotransferase           | $\text{GOAc} + \text{SERc} \rightarrow \text{HPRc} + \text{GLYc}$                              | 1.13      | Same as above                                                                                                               |
| $V_{123}$     | NADH-hydroxypyruvate reductase               | $\text{HPRc} + \text{NADc} \rightarrow \text{NADHc} + \text{GCEAc}$                            | 3.44      | Same as above                                                                                                               |
| $V_{124}$     | Glutamate glyoxylate aminotransferase (GGAT) | $\text{GOAc} + \text{GLUc} \rightarrow \text{KGc} + \text{GLYc}$                               | 0.94      | Same as above                                                                                                               |
| $V_{131}$     | Glycine decarboxylase                        | $\text{GLYc} + \text{NADc} \rightarrow \text{CO}_2 + \text{NH}_3 + \text{SERc} + \text{NADHc}$ | 0.86      | Same as above                                                                                                               |
| $V_{1T}$      | Glycerate/glycolate transporter              | $\text{GCEAc} \leftrightarrow \text{GCEA}$                                                     | 0.4       | Howitz and McCarty (1986)                                                                                                   |
| $V_{2T}$      | Glycerate/glycolate transporter              | $\text{GCAc} \leftrightarrow \text{GCA}$                                                       | 0.4       | Howitz and McCarty (1985)                                                                                                   |

5

6 <sup>a</sup> see table C2



1 **Table D3**

2 The concentrations of the metabolites of photorespiration (PCOP). The range of values found in  
 3 the literature are given in the adjacent column, together with their source.

4

| Metabolite | Location <sup>a</sup> | Concentration (mM) | Assumptions                                                          | Reference                                    |
|------------|-----------------------|--------------------|----------------------------------------------------------------------|----------------------------------------------|
| NADH       | Chl                   | 0.22               | This was kept constant in the preliminary model                      | Igamberdiev et al (2001)                     |
| NADHc      | Cyto                  | 0.47               | As for NADH                                                          | Igamberdiev et al (2001)                     |
| NAD        | Chl                   | 0.08               | As for NADH                                                          | Igamberdiev et al (2001)                     |
| NADc       | Cyt                   | 0.02               | As for NADH                                                          | Igamberdiev et al (2001)                     |
| ATP        | Chl                   | 0.68               |                                                                      | Igamberdiev et al (2001)                     |
| ATPc       | Cyt                   | 0.36               | As for NADH                                                          | Igamberdiev et al (2001)                     |
| ADP        | Chl                   | 0.82               |                                                                      | Igamberdiev et al (2001)                     |
| ADPc       | Cyt                   | 0.64               | As for NADH                                                          | Igamberdiev et al (2001)                     |
| GLUc       | Cyt                   | 24                 | As for NADH                                                          | Winter et al (1993)                          |
| KGc        | Cyt                   | 0.4                | As for NADH                                                          | Winter et al (1993)                          |
| Pic        | Chl                   | 5                  | As for NADH                                                          | Pieters et al (2001)                         |
| SERc       | Cyt                   | 7.5                |                                                                      | Winter et al (1993)                          |
| GLYc       | Cyt                   | 1.8                |                                                                      | Winter et al (1993)                          |
| PGA        | Chl                   | 4.3                |                                                                      | Winter et al (1994)                          |
| GOAc       | Cyt                   | 0.028              | 30 µl cytosol per mg chlorophyll                                     | Winter et al (1993),<br>Wingler et al (1997) |
| GCA        | Chl                   | 0.36               |                                                                      | Coombs and Whittingham (1966)                |
| GCAc       | Cyt                   | 0.36               |                                                                      | Coombs and Whittingham (1966)                |
| PGCA       | Chl                   | 0.003              | Based on the Michaelis-Menton equation for reaction 112 <sup>b</sup> |                                              |
| HPRc       | Cyt                   | 0.004              | Based on the Michaelis-Menton equation for reaction 123 <sup>b</sup> |                                              |
| GCEA       | Chl                   | 0.18               | Based on the Michaelis-Menton equation for reaction 113 <sup>b</sup> |                                              |
| GCEAc      | Cyt                   | 0.18               | Assume equilibrium with stromal Glycerate concentration              |                                              |

5

6 Comment: <sup>a</sup> Chl: chloroplast stroma; Mit: Mitochondrion; Cyt: Cytosol;

# 1 Appendix E

2 Kinetic parameters of enzymes in the metabolic pathway leading to sucrose synthesis in  
3 the cytosol.

## 4 Table E1

5 The Michaelis-Menten constants and inhibition constants for enzymes in the metabolic pathway  
6 leading to sucrose synthesis in the cytosol.

7

| RN <sup>a</sup> | Reaction                       | Param <sup>b</sup> | Value<br>(mmol l <sup>-1</sup> ) <sup>d</sup> | Descri-<br>-ption <sup>c</sup> | CC <sup>e</sup>     | Literature                    |
|-----------------|--------------------------------|--------------------|-----------------------------------------------|--------------------------------|---------------------|-------------------------------|
| 51              | DHAPc + PGAc ↔ FBPC            | K <sub>m511</sub>  | .020                                          | FBPC                           | 4×10 <sup>-6</sup>  | Anderson et al. (1975)        |
| 51              | DHAPc + PGAc ↔ FBPC            | K <sub>m512</sub>  | .300                                          | GAPc                           | -4×10 <sup>-6</sup> | Iwaki et al. (1991)           |
| 51              | DHAPc + PGAc ↔ FBPC            | K <sub>m513</sub>  | .400                                          | DHAPc                          | -4×10 <sup>-6</sup> | Iwaki et al. (1991)           |
| 51              | DHAPc + PGAc ↔ FBPC            | K <sub>m514</sub>  | .014                                          | SBPC                           | 0                   | Harris and Koniger<br>(1997)  |
| 51              | DHAPc + PGAc ↔ FBPC            | K <sub>E51</sub>   | 12                                            |                                | 2×10 <sup>-6</sup>  | Thomas et al. (1997)          |
| 52              | FBPC ↔ F6PC + Pic              | K <sub>m521</sub>  | .0025                                         | FBPC                           | -8×10 <sup>-5</sup> | Jang et al. (2003)            |
| 52              | FBPC ↔ F6PC + Pic              | K <sub>I521</sub>  | .7                                            | F6PC                           | 4×10 <sup>-5</sup>  | Heldt et al. (1983)           |
| 52              | FBPC ↔ F6PC + Pic              | K <sub>I522</sub>  | 12                                            | Pic                            | 2×10 <sup>-5</sup>  | Charles & Halliwell<br>(1981) |
| 52              | FBPC ↔ F6PC + Pic              | K <sub>I523</sub>  | 7*10 <sup>-5</sup>                            | F26BPC                         | 8×10 <sup>-5</sup>  | Jang et al. (2003)            |
| 52              | FBPC ↔ F6PC + Pic              | K <sub>E52</sub>   | 6663                                          |                                | 4×10 <sup>-8</sup>  | Bassham and Krause<br>(1969)  |
| 55              | G1PC + UTPc ↔ GDPc + UDPGc     | K <sub>m551</sub>  | .14                                           | G1PC                           | -1×10 <sup>-7</sup> | Nakano et al. (1989)          |
| 55              | G1PC + UTPc ↔ GDPc + UDPGc     | K <sub>m552</sub>  | .1                                            | UTPC                           | -1×10 <sup>-7</sup> | Nakano et al. (1989)          |
| 55              | G1PC + UTPc ↔ GDPc + UDPGc     | K <sub>m553</sub>  | .11                                           | OPOPC                          | 6×10 <sup>-8</sup>  | Nakano et al. (1989)          |
| 55              | G1PC + UTPc ↔ GDPc + UDPGc     | K <sub>m554</sub>  | .12                                           | UDPGc                          | 7×10 <sup>-8</sup>  | Nakano et al. (1989)          |
| 55              | G1PC + UTPc ↔ GDPc + UDPGc     | K <sub>E55</sub>   | 0.31                                          | Equi                           | 1×10 <sup>-4</sup>  | Lunn and Rees (1990)          |
| 56              | UDPGc + F6PC ↔ SUCPC +<br>UDPC | K <sub>m561</sub>  | 0.8                                           | F6PC                           | -8×10 <sup>-5</sup> | Lunn and Rees (1990)          |
| 56              | UDPGc + F6PC ↔ SUCPC +<br>UDPC | K <sub>m562</sub>  | 2.4                                           | UDPGc                          | -1×10 <sup>-4</sup> | Lunn and Rees (1990)          |
| 56              | UDPGc + F6PC ↔ SUCPC +<br>UDPC | K <sub>I561</sub>  | .7                                            | UDPC                           | 1×10 <sup>-4</sup>  | Harbron et al. (1981)         |
| 56              | UDPGc + F6PC ↔ SUCPC +<br>UDPC | K <sub>I562</sub>  | .8                                            | FBPC                           | 5×10 <sup>-5</sup>  | Harbron et al. (1981)         |
| 56              | UDPGc + F6PC ↔ SUCPC +<br>UDPC | K <sub>I563</sub>  | 0.4                                           | SUCPC                          | 3×10 <sup>-5</sup>  | Harbron et al. (1981)         |
| 56              | UDPGc + F6PC ↔ SUCPC +<br>UDPC | K <sub>I564</sub>  | 11                                            | Pic                            | 3×10 <sup>-5</sup>  | Harbron et al. (1981)         |
| 56              | UDPGc + F6PC ↔ SUCPC +<br>UDPC | K <sub>I565</sub>  | 50                                            | Sucrose                        | 2×10 <sup>-7</sup>  | Salermo and Pontis<br>(1978)  |
| 56              | UDPGc + F6PC ↔ SUCPC +         | K <sub>E56</sub>   | 10                                            | Equi.                          | 4×10 <sup>-6</sup>  | Lunn and Rees (1990)          |

|    | UDPc                        |                   |                     | Const.  |                     |                                           |
|----|-----------------------------|-------------------|---------------------|---------|---------------------|-------------------------------------------|
| 57 | SUCPc ↔ Pic + SUCc          | K <sub>m571</sub> | .35                 | SUCPc   | -2×10 <sup>-5</sup> | Whitaker (1984)                           |
| 57 | SUCPc ↔ Pic + SUCc          | K <sub>i572</sub> | 80                  | SUCc    | 3×10 <sup>-8</sup>  | Whitaker (1984)                           |
| 57 | SUCPc ↔ Pic + SUCc          | K <sub>E57</sub>  | 780                 | Equil.  | 3×10 <sup>-7</sup>  | Lunn and Rees (1990)                      |
|    |                             |                   |                     | Const.  |                     |                                           |
| 58 | F26BPc ↔ F6Pc + Pic         | K <sub>m581</sub> | .032                | F26BPc  | -9×10 <sup>-6</sup> | Macdonald et al. (1989)                   |
| 58 | F26BPc ↔ F6Pc + Pic         | K <sub>i581</sub> | .1                  | F6Pc    | 8×10 <sup>-5</sup>  | Villadsen and Nielsen (2001)              |
| 58 | F26BPc ↔ F6Pc + Pic         | K <sub>i582</sub> | .5                  | Pic     | 8×10 <sup>-5</sup>  | Villadsen and Nielsen (2001)              |
| 59 | F6Pc + ATPc ↔ F26BPc + ADPc | K <sub>m591</sub> | 0.5                 | ATPc    | 8×10 <sup>-5</sup>  | Walker and Huber (Walker and Huber, 1987) |
| 59 | F6Pc + ATPc ↔ F26BPc + ADPc | K <sub>m592</sub> | .021                | F26BPc  | -7×10 <sup>-4</sup> | Garcia de Frutos and Baanante (1995)      |
| 59 | F6Pc + ATPc ↔ F26BPc + ADPc | K <sub>m593</sub> | 0.5                 | F6Pc    | 8×10 <sup>-5</sup>  | Walker and Huber (1987)                   |
| 59 | F6Pc + ATPc ↔ F26BPc + ADPc | K <sub>i591</sub> | .16                 | ADPc    | -6×10 <sup>-5</sup> | Kretschmer and Hofmann (1984)             |
| 59 | F6Pc + ATPc ↔ F26BPc + ADPc | K <sub>i592</sub> | 0.7                 | DHAPc   | -1×10 <sup>-5</sup> | Markham and Kruger (2002)                 |
| 59 | F6Pc + ATPc ↔ F26BPc + ADPc | K <sub>E59</sub>  | 590                 |         | -1×10 <sup>-7</sup> | Cornish-Bowden (1997)                     |
| 60 | F6Pc + ATPc ↔ F26BPc + ADPc | K <sub>m601</sub> | 0.042               | ADPc    | NA                  | Kimura and Shimada (1988)                 |
| 60 | F6Pc + ATPc ↔ F26BPc + ADPc | K <sub>m602</sub> | 1.66                | ATPc    | NA                  | Kimura and Shimada (1988)                 |
| 60 | F6Pc + ATPc ↔ F26BPc + ADPc | K <sub>m603</sub> | 0.28                | UDPc    | NA                  | Jong and Ma (1991)                        |
| 60 | F6Pc + ATPc ↔ F26BPc + ADPc | K <sub>m604</sub> | 16                  | UTPc    | NA                  | Fukuchi et al (1994)                      |
| 60 | F6Pc + ATPc ↔ F26BPc + ADPc | K <sub>E60</sub>  | 16                  | Equili. | NA                  | Lynn and Guynn (1978)                     |
| 61 | SUCPc ↔ SUCc + Pic          | K <sub>E61</sub>  | 1.2*10 <sup>7</sup> | Equili. | -4×10 <sup>-3</sup> | Flodgaard and Fleron (1974)               |
| 62 | SUCc ↔ Sink                 | K <sub>m621</sub> | 5                   | Sucrose | -5×10 <sup>-7</sup> | Weschke et al. (2000)                     |

1 <sup>abcde</sup> The description is same as in the Table C1.

1 **Table E2**

2 The maximum rate of each enzyme ( $V_m$ ) as given in Table 1 for enzymes in the metabolic  
 3 pathway leading to sucrose synthesis, but here normalized on the maximum Rubisco  
 4 carboxylation activity ( $V_1$ ).

5

| Maximum Velocity | Reaction                                       | $V_m/V_1$ | Reference                                                                                 |
|------------------|------------------------------------------------|-----------|-------------------------------------------------------------------------------------------|
| $V_{51}$         | DHAPc + PGAc $\leftrightarrow$ FBPC            | 0.037     | Chen et al (2005),<br>Strand et al. (2000),<br>Strand et al (1999),<br>Chen et al. (2005) |
| $V_{52}$         | FBPC $\leftrightarrow$ F6Pc + Pic              | 0.022     | Same as above                                                                             |
| $V_{55}$         | G1Pc + UTPc $\leftrightarrow$ GDPc +<br>UDPGc  | 0.040     | Same as above                                                                             |
| $V_{56}$         | UDPGc + F6Pc $\leftrightarrow$ SUCPc<br>+ UDPc | 0.019     | Same as above                                                                             |
| $V_{57}$         | SUCPc $\leftrightarrow$ Pic + SUCc             | 0.19      | Same as above                                                                             |
| $V_{58}$         | F26BPc $\leftrightarrow$ F6Pc + Pic            | 0.007     | Same as above                                                                             |
| $V_{59}$         | F6Pc + ATPc $\leftrightarrow$ F26BPc +<br>ADPc | 0.002     | Villadsen and<br>Nielsen (2001)                                                           |
| $V_{60}$         | ATPc + UDPc $\leftrightarrow$ UTPc +<br>ADPc   | 1         | Villadsen and<br>Nielsen (2001)                                                           |

6 <sup>a</sup> see Table C2

1 **Table E3**

2 The concentrations of metabolites in the metabolic pathway leading to sucrose synthesis in the  
3 cytosol.

4

| Metabolite | Location <sup>a</sup> | Concentration<br>(mmol l <sup>-1</sup> ) | Reference                                                                             |
|------------|-----------------------|------------------------------------------|---------------------------------------------------------------------------------------|
| TPc        | Cyt                   | 2.3                                      | Stitt et al. (1980), Stitt et al. (1985), Gerhardt et al. (1987), Laisk et al. (1989) |
| FBPc       | Cyt                   | 2                                        | As above                                                                              |
| F26BPc     | Cyt                   | 7×10 <sup>-6</sup>                       | As above                                                                              |
| UTc        | Cyt                   | 1                                        | As above                                                                              |
| HexPc      | Cyt                   | 6                                        | As above                                                                              |
| UDPG       | Cyt                   | 0.6                                      | As above                                                                              |
| PTc        | Cyt                   | 15                                       | As above                                                                              |
| ATc        | Cyt                   | 1                                        | As above                                                                              |

5

6 Comment: <sup>a</sup> Chl: chloroplast stroma; Mit: Mitochondrion; Cyt: Cytosol;

1

## 2 Appendix F

## 3 Molecular weight and catalytic number of the enzymes in photosynthetic carbon metabolism

4

| Enzyme Name                             | EC        | Molecular Weight (D) | Catalytic number <sup>1</sup> (s <sup>-1</sup> ) | Reference                                                               |
|-----------------------------------------|-----------|----------------------|--------------------------------------------------|-------------------------------------------------------------------------|
| Rubisco                                 | 4.1.1.39  | 588000               | 2*                                               | Spreitzer and Salvucci (2002)                                           |
| PGA Kinase                              | 2.7.2.3   | 45000                | 540                                              | Fifis and Scopes (1978), Bentahir et al (2000)                          |
| GAP Dehydrogenase                       | 1.2.1.12  | 180000               | 50                                               | Speranza and Ferri (1982)                                               |
| Aldolase                                | 4.1.2.13  | 143000               | 65                                               | Krueger and Sschnarrenberger (1983), Moorhead and Pplaxton (1990)       |
| FBPase                                  | 3.1.3.11  | 160000               | 22.9                                             | Tang et al. (2000), Reichert et al.(2000)                               |
| Transketolase                           | 2.2.1.1   | 160000               | 69                                               | Nilsson et al (1998)                                                    |
| SBPase                                  | 3.1.3.37  | 66000                | 81                                               | Teige et al. (1989)<br>Cadet et al. (1988),<br>Cadet and Meunier (1987) |
| PRK                                     | 2.7.1.19  | 90000                | 615                                              | Surek et al. (1985),<br>Porter et al. (1986)                            |
| ADPG Pyrophosphorylase                  | 2.7.7.27  | 210000               | 546                                              | Kleczkowski et al. (1991), Li and Preiss(1992)                          |
| Phosphoglycolate phosphatase            | 3.1.3.18  | 100000               | 292                                              | Kim et al. (2004),<br>Kerr and Gear (1974)                              |
| Glycerate Kinase                        | 2.7.1.31  | 47000                | 200                                              | Kleczkowski et al. (1985), Kleczkowski and Randall (1988)               |
| Glycolate oxidase                       | 1.1.1.79  | 125000               | 437                                              | Kleczkowski et al. (1986), Zelitch(1955)                                |
| Serine Glyoxylate aminotransferase      | 2.6.1.45  | 85000                | 97                                               | Ireland and Joy (1983; Paszkowski and Niedzielska, 1990)                |
| Glycerate dehydrogenase                 | 1.1.1.29  | 90000                | 1629                                             | Julliard and Breton-Gilet (1997), Izumi et al.(1990)                    |
| Glutamate Glyoxylate aminotransferase   | 2.6.1.44  | 70800                | 54                                               | Paszkowski and Niedzielska (1989)                                       |
| Glycine decarboxylase                   | 1.4.4.2   | 270000               | 18                                               | Hiraga and Kikuchi (1980), Kochi and Kikuchi (1974)                     |
| 6-phosphofructo-2-kinase                | 2.7.1.105 | 390000               | 9300                                             | Villadsen and Nielsen (2001), Baez et al. (2003)                        |
| fructose-2,6-bisphosphate 2-phosphatase | 3.1.3.46  | 390000               | 1550                                             | Pilkis et al. (1987),<br>Villadsen and Nielsen (2001),                  |
| UDP Glucose pyrophosphorylase           | 2.7.7.9   | 53000                | 400                                              | Gustafson and Gander (1972),<br>Sowokinos et al (1993)                  |
| Sucrose phosphate synthase              | 2.4.1.14  | 480000               | 640                                              | Sonnenwald et al. (1993)                                                |
| Sucrose phosphatase                     | 3.1.3.24  | 120000               | 2500                                             | Echeverria and Salerno (1994), Lunn et al. (2000)                       |

5

# 1 Appendix G: List of Abbreviations and their units

2

| Abbreviation <sup>a</sup> | Full Name                                                                  | Units                                          |
|---------------------------|----------------------------------------------------------------------------|------------------------------------------------|
| A                         | The photosynthetic CO <sub>2</sub> uptake rate                             | μmol m <sup>-2</sup> s <sup>-1</sup>           |
| ADPG                      | ADP-glucose                                                                | mmol l <sup>-1</sup>                           |
| ADPGPP                    | ADP glucose pyrophosphorylase                                              | NA                                             |
| ATc                       | Total ADP and ATP concentration in cytosol                                 | mmol l <sup>-1</sup>                           |
| ATPase                    | ATP synthase                                                               | NA <sup>b</sup>                                |
| [CO <sub>2</sub> ]        | CO <sub>2</sub> concentration                                              | μmol mol <sup>-1</sup> or mmol l <sup>-1</sup> |
| CA                        | Total adenylate nucleotide in the chloroplast stroma including ATP and ADP | mmol l <sup>-1</sup>                           |
| CN                        | Total of NADP <sup>+</sup> and NADPH in chloroplast stroma                 | mmol l <sup>-1</sup>                           |
| CP                        | The total concentration of phosphate in chloroplast stroma                 | mmol l <sup>-1</sup>                           |
| DHAP                      | Dihydroxyacetone-phosphate                                                 | mmol l <sup>-1</sup>                           |
| DPGA                      | 1,3-bisphosphoglycerate                                                    | mmol l <sup>-1</sup>                           |
| E4P                       | Erythrose 4-phosphate                                                      | mmol l <sup>-1</sup>                           |
| E <sub>t</sub>            | Total Rubisco concentration                                                | mmol l <sup>-1</sup>                           |
| F6P                       | Fructose 6-phosphate                                                       | mmol l <sup>-1</sup>                           |
| FBP                       | Fructose 1,6-bisphosphate                                                  | mmol l <sup>-1</sup>                           |
| F26BP                     | Fructose 2,6-bisphosphate                                                  | mmol l <sup>-1</sup>                           |
| G1P                       | Glucose 1-phosphate                                                        | mmol l <sup>-1</sup>                           |
| G6P                       | Glucose 6-phosphate                                                        | mmol l <sup>-1</sup>                           |
| GAP                       | Glyceraldehyde 3-phosphate                                                 | mmol l <sup>-1</sup>                           |
| GAPDH                     | Glyceraldehyde 3-phosphate dehydrogenase                                   | NA                                             |
| GCA                       | Glycollate                                                                 | mmol l <sup>-1</sup>                           |
| GCEA                      | Glycerate                                                                  | mmol l <sup>-1</sup>                           |
| GDC                       | Glycine decarboxylase                                                      | NA                                             |
| GLUc                      | Glutamate                                                                  | mmol l <sup>-1</sup>                           |
| GLYc                      | Glycine in cytosol                                                         | mmol l <sup>-1</sup>                           |
| GOA                       | Glyoxylate                                                                 | mmol l <sup>-1</sup>                           |
| HexP                      | Hexose phosphate, includes F6P, G6P, and G1P                               | NA                                             |
| GGAT                      | Glycine glyoxylate aminotransferase                                        | NA                                             |
| GSAT                      | Glyoxylate serine aminotransferase                                         | NA                                             |
| HPR                       | Hydroxypyruvate                                                            | mmol l <sup>-1</sup>                           |
| KGc                       | α-Ketoglutarate                                                            | mmol l <sup>-1</sup>                           |
| ODE                       | Ordinary differential equation                                             | NA                                             |
| [O <sub>2</sub> ]         | Oxygen concentration in atmosphere                                         | mmol mol <sup>-1</sup>                         |
| OPOP                      | Pyrophosphate                                                              | mmol l <sup>-1</sup>                           |
| PCOP                      | Photosynthetic carbon oxidation pathway                                    | NA                                             |
| PCRC                      | Photosynthetic carbon reduction cycle                                      | NA                                             |
| PenP                      | Pentose phosphate including Ri5P, Ru5P, Xu5P                               | mmol l <sup>-1</sup>                           |
| 3-PGA                     | 3-Phosphoglycerate                                                         | mmol l <sup>-1</sup>                           |
| PGCA                      | 3-Phosphoglycollate                                                        | mmol l <sup>-1</sup>                           |
| PRK                       | Ribulose-5-phosphate kinase                                                | NA                                             |
| PGCA Pase                 | Phosphoglycollate phosphotase                                              | NA                                             |

|                      |                                                |                                                                              |
|----------------------|------------------------------------------------|------------------------------------------------------------------------------|
| PGA Kinase           | 3-phosphoglycerate kinase                      | NA                                                                           |
| Ri5P                 | Ribose 5-phosphate                             | mmol l <sup>-1</sup>                                                         |
| PRK                  | Phosphoribulose kinase                         | mmol l <sup>-1</sup>                                                         |
| PTc                  | Total phosphate concentration in cytosol       | mmol l <sup>-1</sup>                                                         |
| Ru5P                 | Ribulose 5-phosphate                           | mmol l <sup>-1</sup>                                                         |
| Rubisco              | Ribulose1,5-bisphosphate Carboxylase/Oxygenase | NA                                                                           |
| R <sub>t</sub>       | Total RuBP concentration in stroma             | mmol l <sup>-1</sup>                                                         |
| RuBP                 | Ribulose 1,5-biphosphate                       | mmol l <sup>-1</sup>                                                         |
| S7P                  | Sedoheptulose 7-phosphate                      | mmol l <sup>-1</sup>                                                         |
| SBP                  | Sedoheptulose 1,7-bisphosphate                 | mmol l <sup>-1</sup>                                                         |
| SBPase               | Sedoheptulosebisphosphatase                    | NA                                                                           |
| SERc                 | Serine in cytosol                              | mmol l <sup>-1</sup>                                                         |
| SPP                  | Sucrose phosphate phosphatase                  | NA                                                                           |
| SPS                  | Sucrose phosphate synthetase                   | NA                                                                           |
| TPU                  | Triose phosphate utilization                   | NA                                                                           |
| SUCc                 | Sucrose in cytosol                             | mmol l <sup>-1</sup>                                                         |
| SUCPc                | Sucrose phosphate in cytosol                   | mmol l <sup>-1</sup>                                                         |
| T3P                  | Triose phosphate including DHAP and GAP        | mmol l <sup>-1</sup>                                                         |
| v <sub>111</sub>     | The rate of RuBP oxygenation                   | μmol m <sup>-2</sup> s <sup>-1</sup> or mmol l <sup>-1</sup> s <sup>-1</sup> |
| UDPGc                | Uridine Diphosphate Glucose                    | mmol l <sup>-1</sup>                                                         |
| UDPGP                | UDP glucose pyrophosphorylase                  | NA                                                                           |
| UT                   | Total UDP and UTP concentration in cytosol     | mmol l <sup>-1</sup>                                                         |
| v <sub>i</sub>       | The rate of RuBP carboxylation                 | μmol m <sup>-2</sup> s <sup>-1</sup> or mmol l <sup>-1</sup> s <sup>-1</sup> |
| v <sub>atpg</sub>    | The rate of ATP formation in cytosol           | μmol m <sup>-2</sup> s <sup>-1</sup> or mmol l <sup>-1</sup> s <sup>-1</sup> |
| v <sub>pga_use</sub> | The rate of PGA utilization in cytosol         | μmol m <sup>-2</sup> s <sup>-1</sup> or mmol l <sup>-1</sup> s <sup>-1</sup> |
| Xu5P                 | Xylulose 5-phosphate                           | mmol l <sup>-1</sup>                                                         |

1 <sup>a</sup> A suffix c was added to the name of metabolites appeared in cytosol if the metabolite also exists in stroma. For example, PGA is the  
2 phosphoglycerate in stroma; while PGAc is the phosphoglycerate in cytosol.

3 <sup>b</sup> NA: Not applicable

4
